# Supplementary material for: Investigating the pathogens associated with Dermacentor nuttalli and its global distribution: A study integrating metagenomic sequencing, meta-analysis and niche modeling
Source: PubMed Central journal article supplement — Int J Parasitol Parasites Wildl. 2024 Jan 16;23:100907. doi: 10.1016/j.ijppaw.2024.100907 (PMC10810740; doi:10.1016/j.ijppaw.2024.100907), 2024-01-16
Supplement: mmc3.pdf [file mmc3.pdf]

## Figure S2: Response curves of environmental variables to the probability of suitability for *Dermacentor nuttalli*.

The curves show the mean response of 25 replicate MaxEnt runs (red line) and standard deviation (blue shades).

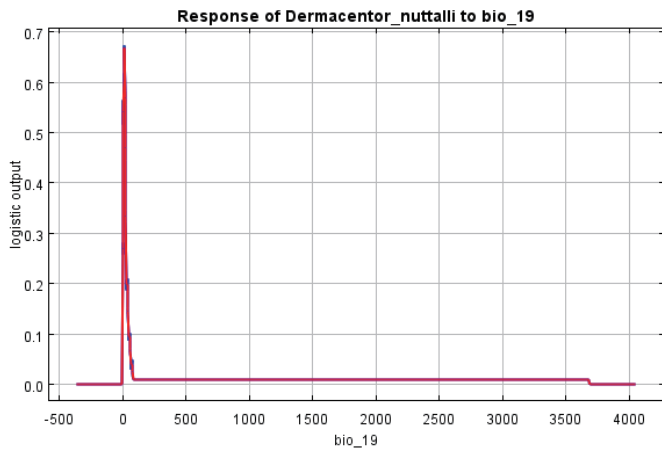

Precipitation of Coldest Quarter

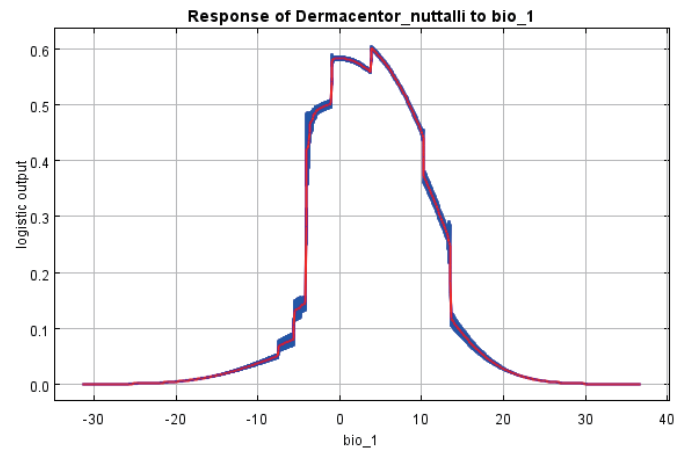

Annual Mean Temperature

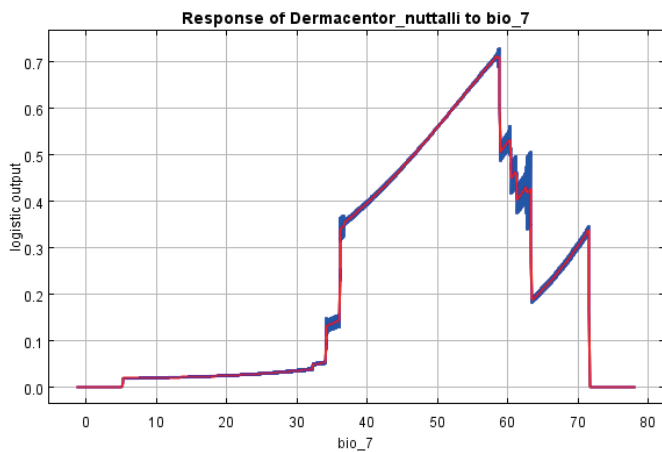

Temperature Annual Range

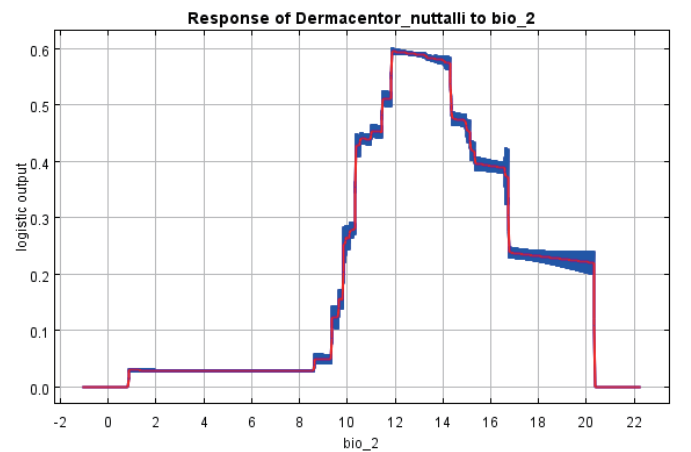

Mean Diurnal Range

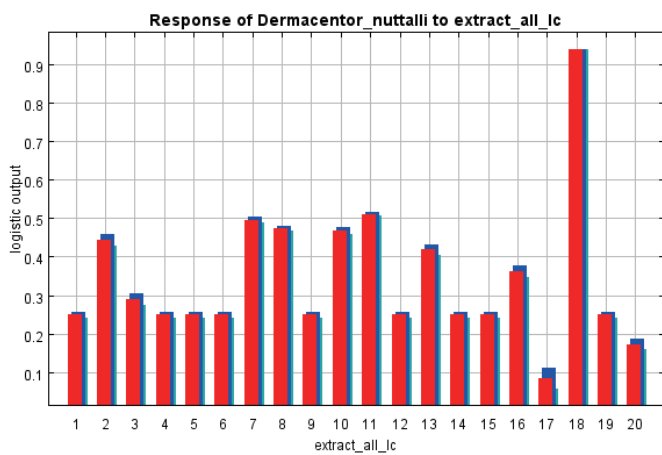

Land Cover

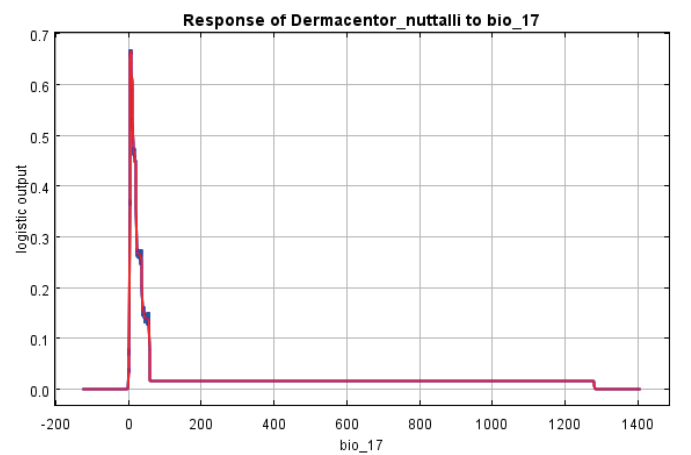

Precipitation of Driest Quarter
