# Supplementary figures and images for: Investigating the pathogens associated with Dermacentor nuttalli and its global distribution: A study integrating metagenomic sequencing, meta-analysis and niche modeling
Source: PubMed Central journal article supplement — Int J Parasitol Parasites Wildl. 2024 Jan 16;23:100907. doi: 10.1016/j.ijppaw.2024.100907 (PMC10810740; doi:10.1016/j.ijppaw.2024.100907), 2024-01-16

**Figure S1: Locations of the sampling points in the field surveys.**

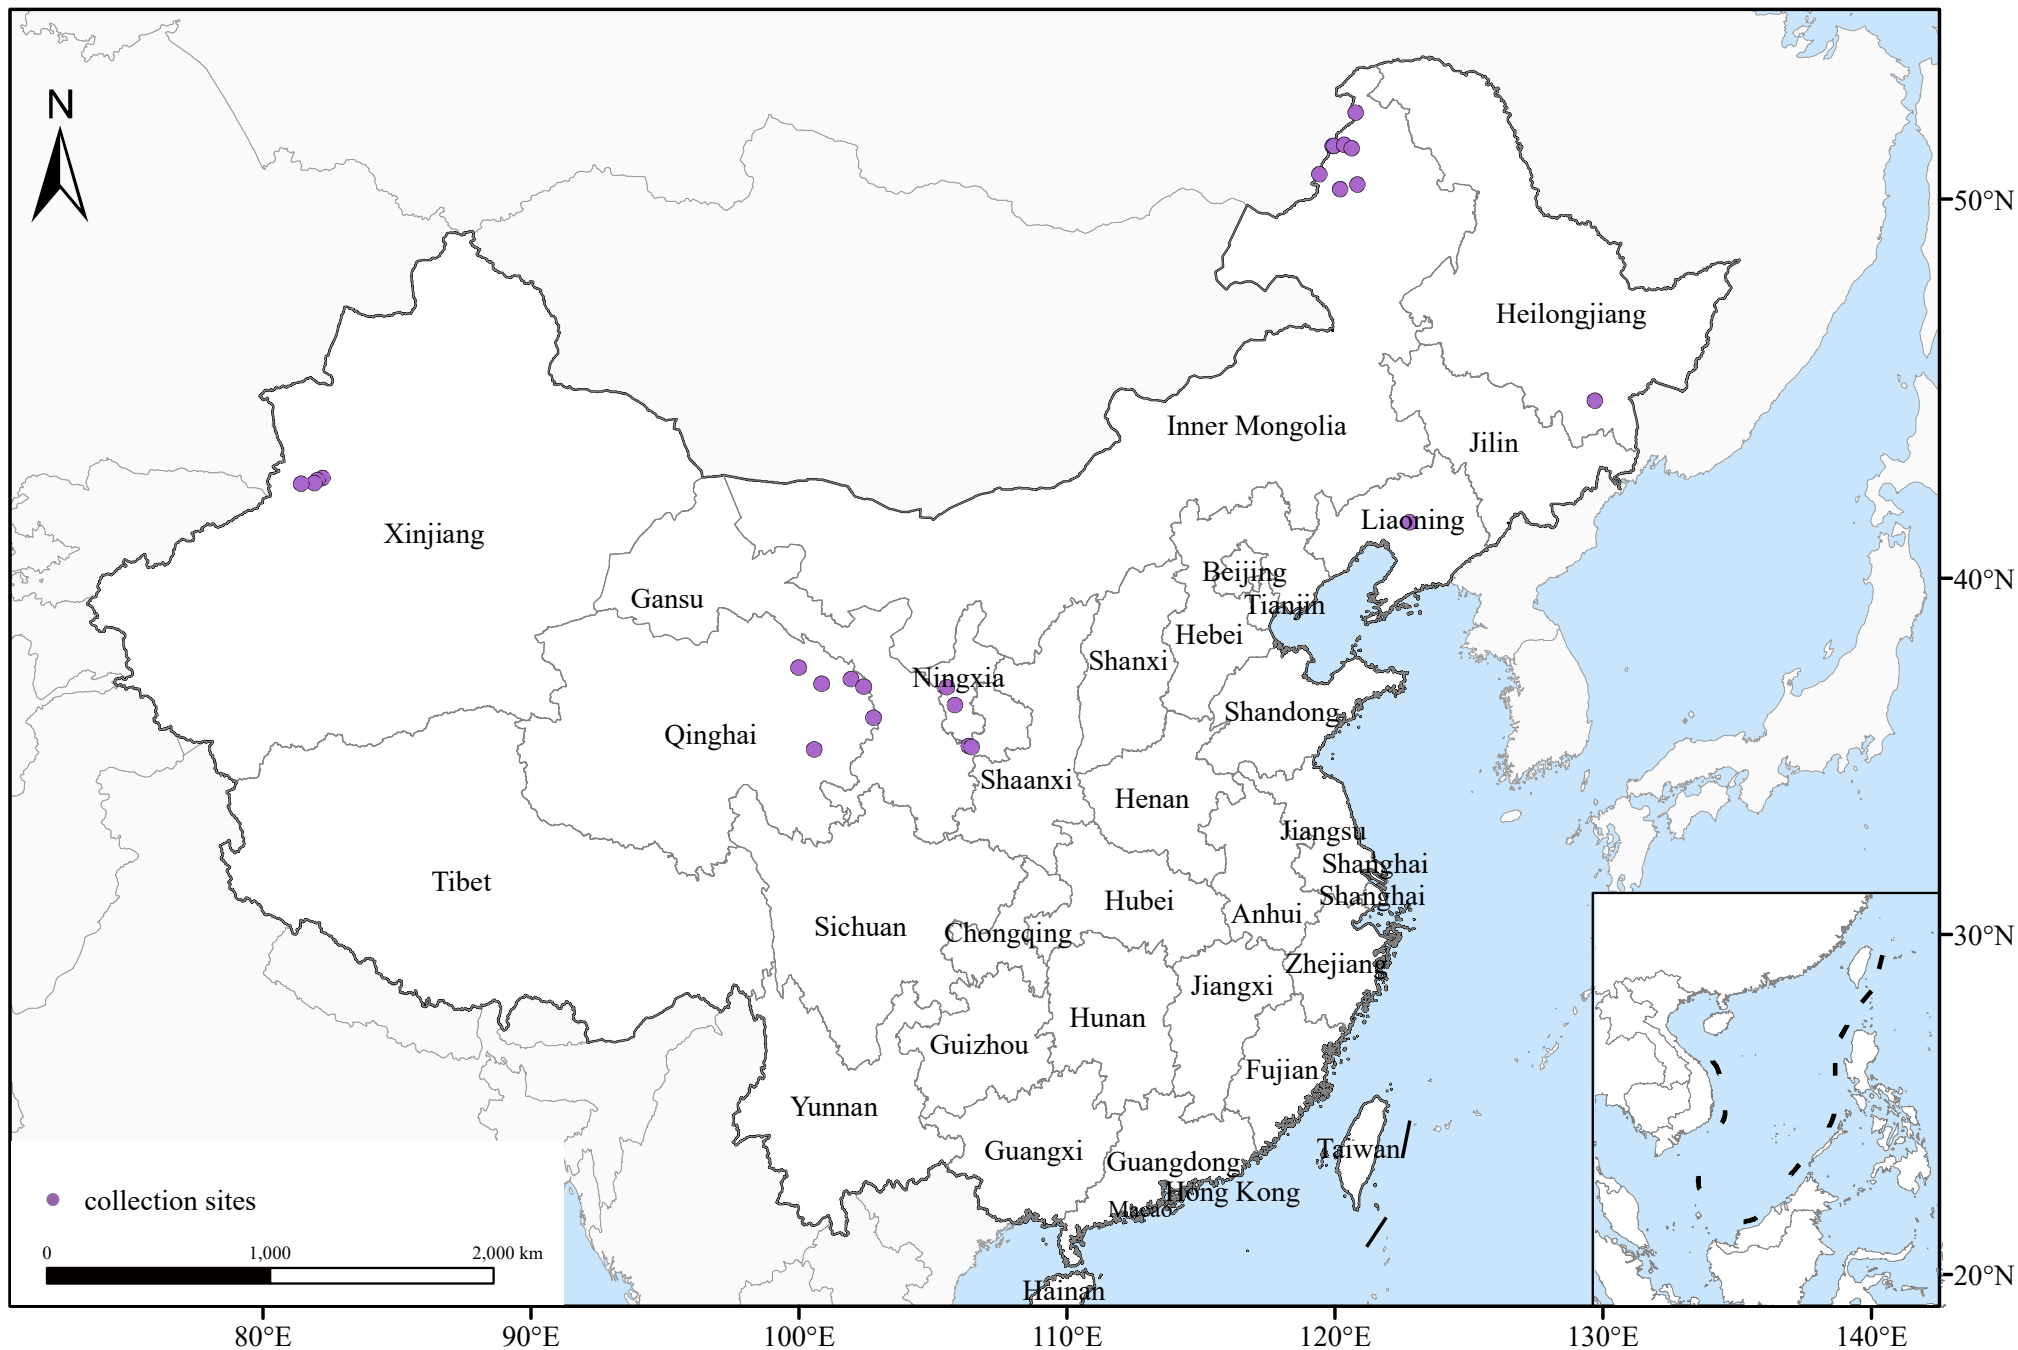

Supplement: mmc2.pdf [file mmc2.pdf]
